# Supplementary material
Source: publisher figshare collection journal article supplement (https://brill.figshare.com/articles/dataset/_/19345460)
Supplement: Supplementary file 1 [file 1]

## **Arboreal wildlife bridges in the tropical rainforest of Costa Rica's Osa**

### **Peninsula**

Eleanor Flatt<sup>a,b</sup>, Arianna Basto<sup>a,c</sup>, Carolina Pinto<sup>a,d</sup>, Johan Ortiz<sup>a</sup>, Kassandra Navarro<sup>a,e</sup>, Neil Reed<sup>a</sup>, Hilary Brumberg<sup>a,f</sup>, Marco Hidalgo Chaverri<sup>a,e</sup> and Andrew Whitworth<sup>a,g</sup>.

<sup>a</sup>Osa Conservation, Washington, DC 20005, USA

<sup>b</sup>Deanery of Biomedical Sciences, College of Medicine and Veterinary Medicine, University of Edinburgh, Edinburgh, EH8 9AG, UK

<sup>c</sup>Human Dimensions of Natural Resources, Colorado State University, Fort Collins, CO 80523, USA

<sup>d</sup>Faculty of Exact and Natural Sciences, Buenos Aires University, Buenos Aires, C1428EGA, Argentina

<sup>e</sup>National University of Costa Rica, Heredia, Costa Rica

<sup>f</sup>Environmental Studies Department, University of Colorado Boulder, CO 80309, USA

<sup>g</sup>Institute of Biodiversity, Animal Health and Comparative Medicine, College of Medical, Veterinary and Life Sciences, University of Glasgow, Glasgow, G12 8QQ, UK

\*Corresponding author; e-mails: [e.j.flatt@sms.ed.ac.uk](mailto:e.j.flatt@sms.ed.ac.uk); [eleanorflatt93@gmail.com](mailto:eleanorflatt93@gmail.com)

**Supplementary material**

**Table S1.** Independent wildlife activity events (total events) of all species using the different designs, separated by arboreal bridges by check (check1 in March and check2 in August), and separated by species.

[illegible]
